# Supplementary material
Source: Springer Nature journal article supplement (https://www.springermedizin.de/resource/supplementary/12943_2012_1021_MOESM1_ESM.pdf/9552150)

## GENE SILENCING

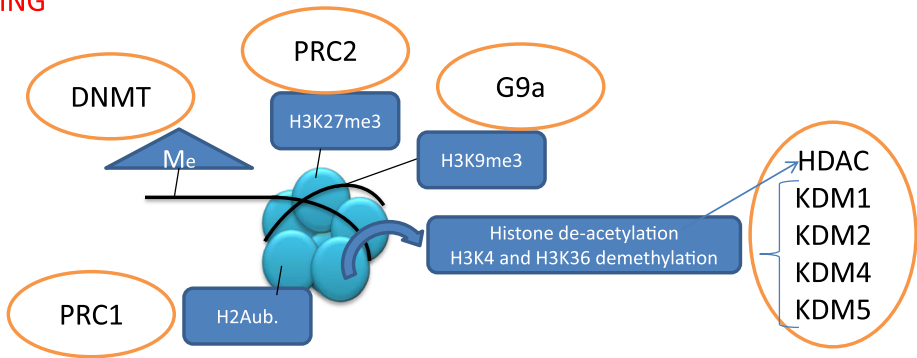

## GENE ACTIVATION

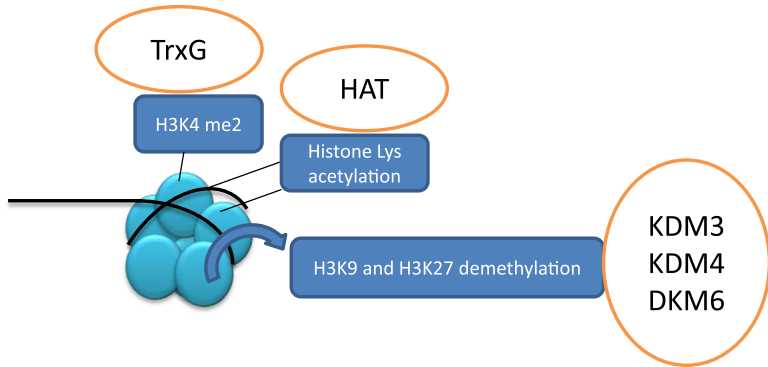

Supplement: MOESM1 [file 9552150]
